# Supplementary material for: Synthesis of Poly(Malic Acid) Derivatives End-Functionalized with Peptides and Preparation of Biocompatible Nanoparticles to Target Hepatoma Cells
Source: PubMed Central journal article supplement (PMC8070460; doi:10.3390/nano11040958), 2021-04-09
Supplement: nanomaterials-11-00958-s001.pdf [file nanomaterials-11-00958-s001.pdf]

## Supplementary files

# Synthesis of Poly(Malic Acid) Derivatives End-Functionalized with Peptides and Preparation of Biocompatible Nanoparticles to Target Hepatoma Cells

**Clarisse Brossard**<sup>1</sup>, **Manuel Vlach**<sup>2</sup>, **Elise Vène**<sup>2,3</sup>, **Catherine Ribault**<sup>2</sup>, **Vincent Dorcet**<sup>1</sup>, **Nicolas Noiret**<sup>1</sup>, **Pascal Loyer**<sup>2,\*</sup>, **Nicolas Lepareur**<sup>2,4,\*</sup> and **Sandrine Cammas-Marion**<sup>1,2,\*</sup>

<sup>1</sup> Univ Rennes, Ecole Nationale Supérieure de Chimie de Rennes, CNRS, ISCR, UMR 6226, ScanMAT, UMS2001, F-35000 Rennes, France; clarisse.brossard@ensc-rennes.fr (C.B.); vincent.dorcet@univ-rennes1.fr (V.D.); nicolas.noiret@ensc-rennes.fr (N.N.)

<sup>2</sup> INSERM, INRAE, University Rennes, Institut NUMECAN (Nutrition Metabolisms and Cancer) UMR\_A 1341, UMR\_S 1241, F-35000 Rennes, France; manuel.vlach@univ-rennes1.fr (M.V.); elise.vene@univ-rennes1.fr (E.V.); catherine.ribault@univ-rennes1.fr (C.R.)

<sup>3</sup> Pôle Pharmacie, Service Hospitalo-Universitaire de Pharmacie, CHU Rennes, F-35033 Rennes, France

<sup>4</sup> Comprehensive Cancer Center Eugène Marquis, F-35000 Rennes, France

\* Correspondence: pascal.loyer@univ-rennes1.fr (P.L.); n.lepareur@rennes.unicancer.fr (N.L.); sandrine.marion.1@ensc-rennes.fr (S.C.-M.)

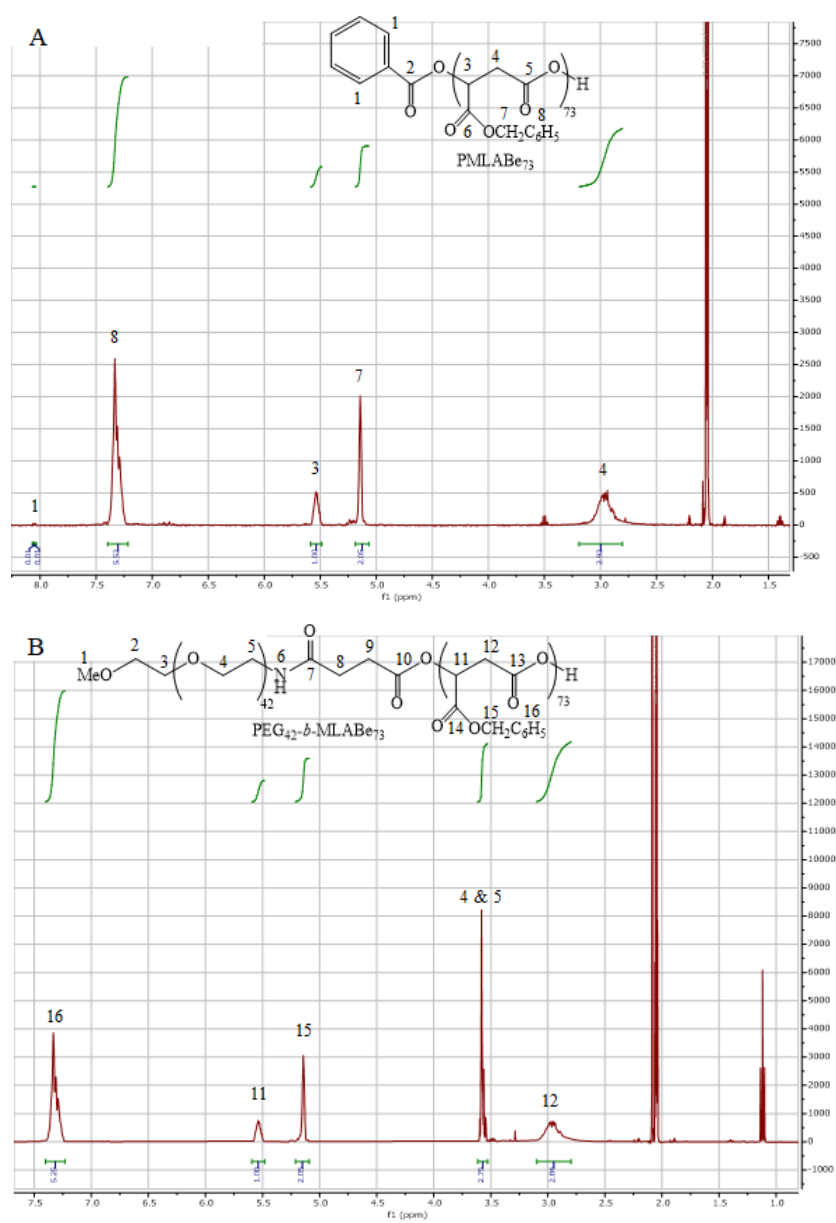

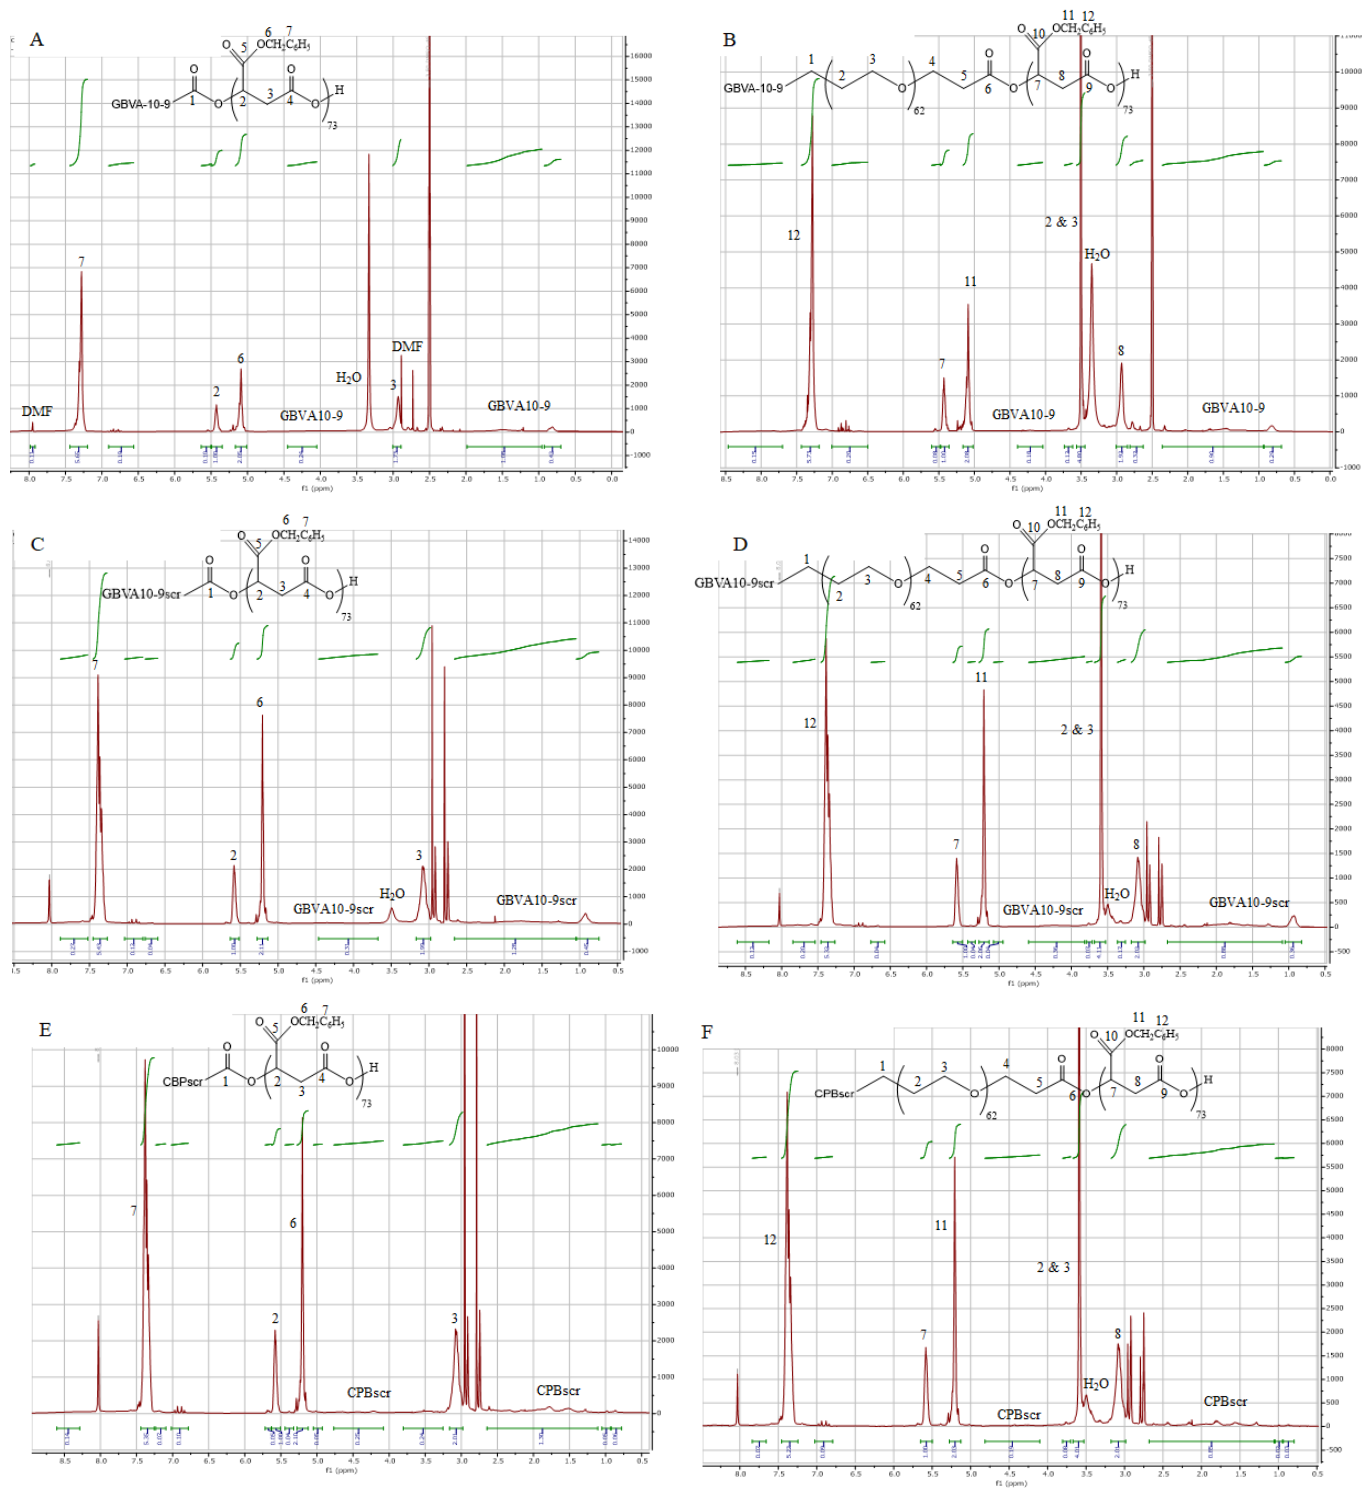

**Figure S2.**  $^1\text{H}$  NMR spectra of A. GBVA10-9PMLABe<sub>73</sub> (DMSO- $d_6$ ), B. GBVA10-9PEG<sub>62</sub>-*b*-PMLABe<sub>73</sub> (DMSO- $d_6$ ), C. GBVA10-9scrPMLABe<sub>73</sub> (DMF- $d_7$ ), D. GBVA10-9scrPEG<sub>62</sub>-*b*-PMLABe<sub>73</sub> (DMF- $d_7$ ), E. CPBscrPMLABe<sub>73</sub> (DMF- $d_7$ ), F. CPBscrPEG<sub>62</sub>-*b*-PMLABe<sub>73</sub> (DMF- $d_7$ ).

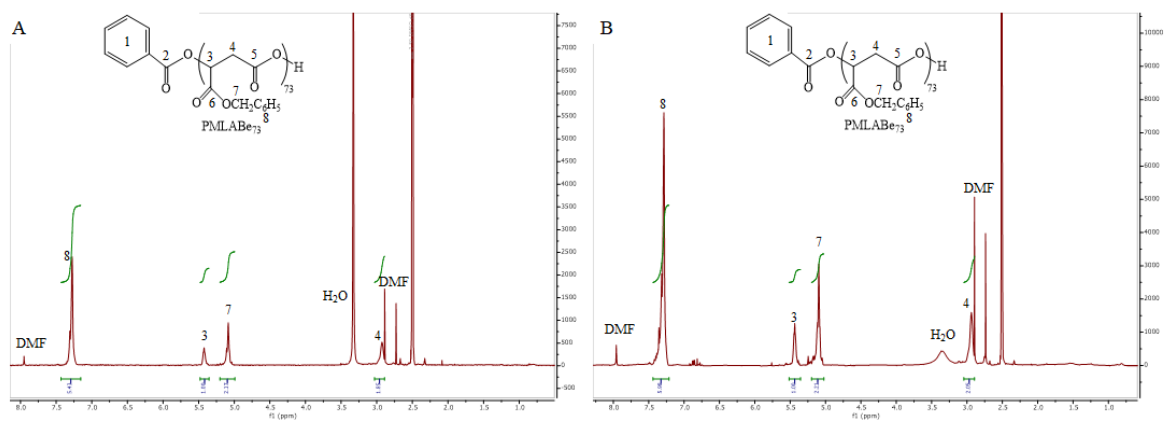

**Figure S3.**  $^1\text{H}$  NMR spectra of products obtained after dialysis of: A. a mixture of PMLABe<sub>73</sub> and GBVA10-9-SH, and B. a mixture of PMLABe<sub>73</sub> and CPB-SH.
